# Supplementary material for: How do HYNIC-conjugated peptides bind technetium? Insights from LC-MS and stability studies
Source: Royal Society of Chemistry journal article supplement (doi:10.1039/b705111e), 2007-01-01

# How do HYNIC-conjugated peptides bind technetium? Insights from LC-MS and stability studies.

Robert C King, M Bashir-Uddin Surfraz, Stefano CG Biagini, Philip J Blower, and Stephen J Mather

## Dalton Discussion 10

### Supplementary Information

Tables A – H: LC-MS data for  $^{99}\text{Tc}$  peptide conjugates, including HPLC profile and ES-MS assignments

Table I – HPLC data on  $^{99\text{m}}\text{Tc}$  and  $^{99}\text{Tc}$  labeled peptides

Figure: High resolution detail of molecular ions to demonstrate confidence in number of protons displaced during Tc-binding

Throughout, calculated m/z values are based on the following exact molecular mass data calculated for uncharged molecules and atoms using ChemDraw analytical tool

HYNIC-nanogastrin conjugate = 1279.5 ( $\text{M}^+$  1280.5,  $\text{M}$  1278.5)

HYBA-nanogastrin conjugate = 1278.5 ( $\text{M}^+$  1279.5,  $\text{M}$  1277.5)

Tc = 98.9

Nicotinic acid = 123.03

Tricine = 179.08

N,N'-Ethylenediamine diacetic acid (EDDA) = 176.08

Trifluoroacetic acid (TFA) = 113.99

Acetonitrile (ACN) = 41.03

In each table, P refers to the unlabelled peptide conjugate (HYNIC-nanogastrin or HYBA-nanogastrin)

TABLE A  
Unlabelled peptides

| peptide                              | Method A, B, C | % of base peak | m/z calc | m/z obs | Assignment                              | Inferred solution species from which in originates |
|--------------------------------------|----------------|----------------|----------|---------|-----------------------------------------|----------------------------------------------------|
| HYNIC-nanogastrin                    | C              | 100            | 640.8    | 640.9   | $[\text{P}+2\text{H}]^{2+}$             | P                                                  |
|                                      | C              | 45             | 1280.5   | 1280.5  | $[\text{P}+\text{H}]^+$                 |                                                    |
| HYBA-nanogastrin                     | C              | 100            | 639.3    | 639.3   | $[(\text{P}-2\text{H})+2\text{H}]^{2+}$ | P-2H                                               |
|                                      | C              | 30             | 1277.5   | 1277.3  | $[(\text{P}-2\text{H})+\text{H}]^+$     |                                                    |
|                                      | C              | 30             | 640.5    | 640.2   | $[\text{P}+2\text{H}]^{2+}$             | P                                                  |
|                                      | C              | 15             | 1279.5   | 1279.4  | $[\text{P}+\text{H}]^+$                 |                                                    |
| HYNIC-[gly <sup>8</sup> ]nanogastrin | B              | 100            | 1208.2   | 1208.4  | $[\text{P}+\text{H}]^+$                 | P                                                  |
|                                      | B              | 20             | 604.1    | 604.8   | $[\text{P}+2\text{H}]^{2+}$             |                                                    |

TABLE B  
P = Nanogastrin-hynic, coligand = tricine

| HPLC peak selected                                                                  | Method A,B,C | % of base peak | m/z calc | m/z obs | Assignment                                                           | Inferred solution species from which in originates |
|-------------------------------------------------------------------------------------|--------------|----------------|----------|---------|----------------------------------------------------------------------|----------------------------------------------------|
| 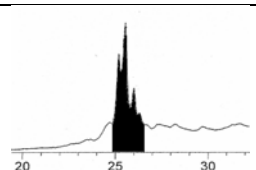 | B            | 100            | 777.2    | 777.5   | $[(\text{P}+\text{Tc}+\text{Tri}-5\text{H})+2\text{H}]^{2+}$         | (P+Tc+Tri-5H)                                      |
|                                                                                     | B            | 15             | 1553.5   | 1553.2  | $[(\text{P}+\text{Tc}+\text{Tri}-5\text{H})+\text{H}]^+$             |                                                    |
|                                                                                     | A            | 90             | 1551.5   | 1551.4  | $[(\text{P}+\text{Tc}+\text{Tri}-5\text{H})-\text{H}]^-$             |                                                    |
|                                                                                     | A            | 100            | 1665.5   | 1664.7  | $[(\text{P}+\text{Tc}+\text{Tri}-5\text{H}+\text{TFA})-\text{H}]^-$  |                                                    |
|                                                                                     | A            | 80             | 1179.5   | 1778.5  | $[(\text{P}+\text{Tc}+\text{Tri}-5\text{H})+2\text{TFA}-\text{H}]^-$ |                                                    |
|                                                                                     | C            | 100            | 1553.5   | 1553.3  | $[(\text{P}+\text{Tc}+\text{Tri}-5\text{H})+\text{H}]^+$             |                                                    |
|                                                                                     | C            | 40             | 777.2    | 777.3   | $[(\text{P}+\text{Tc}+\text{Tri}-5\text{H})+2\text{H}]^{2+}$         |                                                    |

TABLE C

P = nanogastrin-hynic, coligand = tricine + nicotinic acid

| HPLC peak selected | Method A,B,C | % of base peak | m/z calc | m/z obs | assignment                        | Inferred solution species from which in originates |
|--------------------|--------------|----------------|----------|---------|-----------------------------------|----------------------------------------------------|
|                    | B            | 100            | 846.8    | 846.9   | $[(P+O+Tc+Tri+Nic-5H)+2H]^{2+}$   | (P+O+Tc+Nic-5H)                                    |
|                    | B            | 2              | 1692.5   | 1692.2  | $[(P+O+Tc+Tri+Nic-5H)+H]^+$       |                                                    |
|                    | A            | 100            | 1690.5   | 1690.3  | $[(P+O+Tc+Tri+Nic-5H)-H]^-$       |                                                    |
|                    | A            | 30             | 1804.5   | 1803.0  | $[(P+O+Tc+Tri+Nic+TFA-5H)-H]^-$   | (P+Tc+Tri-5H)                                      |
|                    | A            | 25             | 1551.5   | 1551.0  | $[(P+Tc+Tri-5H)-H]^-$             |                                                    |
|                    | B            | 100            | 839.2    | 838.9   | $[(P+Tc+Tri+Nic-5H)+2H]^{2+}$     | (P+Tc+Tri+Nic-5H)                                  |
|                    | B            | 30             | 1676.5   | 1677.3  | $[(P+Tc+Tri+Nic-5H)+H]^+$         |                                                    |
|                    | A            | 100            | 1674.5   | 1674.3  | $[(P+Tc+Tri+Nic-5H)-H]^-$         |                                                    |
|                    | A            | 15             | 1788.5   | 1787.0  | $[(P+Tc+Tri+Nic+TFA-H)]^-$        | (P+Tc+Tri+2Nic-5H)                                 |
|                    | C            | 100            | 839.2    | 838.9   | $[(P+Tc+Tri+Nic-5H)+2H]^{2+}$     |                                                    |
|                    | C            | 10             | 1676.5   | 1676.1  | $[(P+Tc+Tri+Nic-5H)+H]^+$         | (P+Tc+Tri+2Nic-5H)                                 |
|                    | B            | 25             |          | 1118.0  | ?                                 |                                                    |
|                    | B            | 15             | 899.8    | 900.2   | $[(P+Tc+Tri+2Nic-5H)+2H]^{2+}$    |                                                    |
|                    | C            | 30             | 899.8    | 900.6   | $[(P+Tc+Tri+2Nic-5H)+2H]^{2+}$    |                                                    |
|                    | C            | 2              | 1799.5   | 1799.9  | $[(P+Tc+Tri+2Nic-5H)+2H]^{2+}$    |                                                    |
|                    | B            | 100            |          | 1115.5  | ?                                 | (P-H2O+Tc+Tri+Nic-5H)                              |
|                    | B            | 50             | 829.8    | 829.9   | $[(P+Tc+Tri+Nic-H2O-5H)+2H]^{2+}$ |                                                    |
|                    | A            | 80             | 1656.5   | 1656.3  | $[(P+Tc+Tri+Nic-H2O-5H)-H]^-$     | (P+Tc+Tri+Nic-5H)                                  |
|                    | A            | 40             | 1674.5   | 1674.2  | $[(P+Tc+Tri+Nic-5H)-H]^-$         |                                                    |
|                    | A            | 35             | 1770.5   | 1768.9  | $[(P+Tc+Tri+Nic+TFA-5H)-H]^-$     |                                                    |
|                    | B            | 45             | 839.2    | 838.8   | $[(P+Tc+Tri+Nic-5H)+2H]^{2+}$     | (P+Tc+Tri+Nic-5H)                                  |
|                    | A            | 100            |          | 1340.5  | ?                                 |                                                    |
|                    | B            | 100            | 866.8    | 867.0   | $[(P+Tc+2Tri-5H)+H]^+$            | (P+Tc+2Tri-5H)                                     |
|                    | A            | 100            | 1730.6   | 1731.4  | $[(P+Tc+2Tri-5H)-H]^-$            | (P+Tc+Tri+Nic-5H)                                  |
|                    | B            | 45             | 839.2    | 838.9   | $[(P+Tc+Tri+Nic-5H)+2H]^{2+}$     |                                                    |
|                    | B            | 25             |          | 1043.2  | ?                                 | (P+Tc+Tri+Nic-5H)                                  |
|                    | B            | 20             |          | 930.1   | ?                                 |                                                    |
|                    | A            | 20             |          | 1843.3  | ?                                 |                                                    |
|                    | B            | 100            |          | 1128.2  | ?                                 | (P+Tc+Tri+Nic-5H)                                  |
|                    | B            | 40             |          | 838.8   | ?                                 |                                                    |

TABLE D

P = NG-HYNIC, coligand = Tricine+EDDA

| HPLC peak selected | Method A,B,C | % of base peak | m/z calc | m/z obs | assignment                  | Inferred solution species from which in originates |
|--------------------|--------------|----------------|----------|---------|-----------------------------|----------------------------------------------------|
|                    | B            | 100            | 863.8    | 864.0   | $[(P+Tc+2EDDA-5H)+2H]^{2+}$ | P+Tc+2EDDA-5H                                      |
|                    | B            | 12             | 1726.6   | 1726.2  | $[(P+Tc+2EDDA-5H)+H]^+$     |                                                    |
|                    | A            | 70             | 1724.6   | 1724.3  | $[(P+Tc+2EDDA-5H)-H]^-$     |                                                    |
|                    | A            | 35             | 1838.6   | 1838.5  | $[(P+Tc+2EDDA+TFA-5H)-H]^-$ | (P+Tc+EDDA-5H)                                     |
|                    | C            | 100            | 863.8    | 863.9   | $[(P+Tc+2EDDA-5H)+2H]^{2+}$ |                                                    |
|                    | C            | 7              | 1726.6   | 1726.1  | $[(P+Tc+2EDDA-5H)+H]^+$     | (P+Tc+EDDA-5H)                                     |
|                    | B            | 3              | 1550.5   | 1550.2  | $[(P+Tc+EDDA-5H)+H]^+$      |                                                    |
|                    | C            | 3              | 1550.5   | 1551.3  | $[(P+Tc+EDDA-5H)+H]^+$      |                                                    |
|                    | B            | 20             |          | 1151.4  | ?                           |                                                    |
|                    | A            | 100            |          | 1376.8  | ?                           |                                                    |
|                    | A            | 65             |          | 1263.6  | ?                           | (P+Tc+EDDA-5H)                                     |
|                    | B            | 100            |          | 668.9   | ?                           |                                                    |
|                    | B            | 60             |          | 863.9   | ?                           | (P+Tc+EDDA-5H)                                     |
|                    | B            | 45             |          | 1017.3  | ?                           |                                                    |
|                    | B            | 35             |          | 1336.4  | ?                           |                                                    |
|                    | A            | 100            |          | 1334.5  | ?                           | (P+Tc+EDDA-5H)                                     |
|                    | A            | 80             |          | 1447.6  | ?                           |                                                    |

TABLE E  
P = NG-HYBA, coligand = tricine

| HPLC peak selected                                                                | Method A,B,C                                                                       | % of base peak | m/z calc | m/z obs | assignment                    | Inferred solution species from which in originates |
|-----------------------------------------------------------------------------------|------------------------------------------------------------------------------------|----------------|----------|---------|-------------------------------|----------------------------------------------------|
| 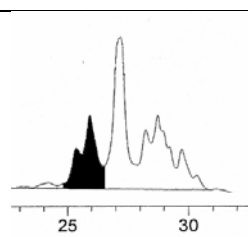 | A                                                                                  | 100            | 1550.5   | 1550.3  | $[(P+Tc+Tri-5H)-H]^-$         | [P+Tc+Tri-5H]                                      |
|                                                                                   | A                                                                                  | 95             | 1664.5   | 1663.7  | $[(P+Tc+Tri+TFA-5H)-H]^-$     |                                                    |
|                                                                                   | B                                                                                  | 100            | 797.3    | 797.3   | $[(P+Tc+Tri+ACN-5H)+2H]^{2-}$ |                                                    |
|                                                                                   | B                                                                                  | 15             | 776.8    | 776.9   | $[(P+Tc+Tri-5H)+2H]^{2-}$     |                                                    |
|                                                                                   | B                                                                                  | 5              | 1552.5   | 1552.2  | $[(P+Tc+Tri-5H)+H]^-$         |                                                    |
|                                                                                   | B                                                                                  | 3              | 1593.5   | 1593.4  | $[(P+Tc+Tri+ACN-5H)+H]^-$     |                                                    |
|                                                                                   | A                                                                                  | 35             |          | 1704.5  | ?                             |                                                    |
|                                                                                   | A                                                                                  | 30             |          | 1818.5  | ?                             |                                                    |
|  | A                                                                                  | 100            | 1550.5   | 1550.4  | $[(P+Tc+Tri-5H)-H]^-$         | [P+Tc+Tri-5H]                                      |
|                                                                                   | A                                                                                  | 25             | 1664.5   | 1663.2  | $[(P+Tc+Tri+TFA-5H)H]^-$      |                                                    |
|                                                                                   | B                                                                                  | 40             | 776.8    | 777.0   | $[(P+Tc+Tri-5H)+2H]^{2-}$     |                                                    |
|                                                                                   | B                                                                                  | 20             |          | 1552.3  | $[(P+Tc+Tri-5H)+H]^+$         |                                                    |
|                                                                                   | A                                                                                  | 25             | 1729.6   | 1729.2  | $[(P+Tc+2Tri-5H)-H]^-$        | [P+Tc+2Tri-5H]                                     |
|                                                                                   | B                                                                                  | 100            | 866.3    | 866.4   | $[(P+Tc+2Tri-5H)+2H]^{2+}$    |                                                    |
|                                                                                   | B                                                                                  | 20             | 1731.6   | 1732.1  | $[(P+Tc+2Tri-5H)+H]^+$        |                                                    |
|                                                                                   | A                                                                                  | 25             |          | 1859.2  | ?                             |                                                    |
|                                                                                   | A                                                                                  | 20             |          | 1745.8  | ?                             |                                                    |
|                                                                                   | A                                                                                  | 50             |          | 1704.6  | ?                             |                                                    |
|                                                                                   | A                                                                                  | 30             |          | 1436.5  | ?                             |                                                    |
|                                                                                   | B                                                                                  | 30             |          | 1719.8  | ?                             |                                                    |
|                                                                                   | B                                                                                  | 25             |          | 817.8   | ?                             |                                                    |
|                                                                                   |  | A              | 100      |         | 1375.9                        | ?                                                  |
| A                                                                                 |                                                                                    | 65             |          | 1418.7  | ?                             |                                                    |
| A                                                                                 |                                                                                    | 15             |          | 1460.5  | ?                             |                                                    |
| A                                                                                 |                                                                                    | 100            |          | 1333.4  | ?                             |                                                    |
| A                                                                                 |                                                                                    | 85             |          | 1446.6  | ?                             |                                                    |
| A                                                                                 |                                                                                    | 40             |          | 1460.9  | ?                             |                                                    |
| A                                                                                 |                                                                                    | 35             |          | 1347.5  | ?                             |                                                    |
| A                                                                                 |                                                                                    | 100            |          | 1387.7  | ?                             |                                                    |
| A                                                                                 |                                                                                    | 55             |          | 1274.6  | ?                             |                                                    |
| A                                                                                 |                                                                                    | 100            |          | 1444.6  | ?                             |                                                    |
| A                                                                                 |                                                                                    | 85             |          | 1331.5  | ?                             |                                                    |
| A                                                                                 |                                                                                    | 100            |          | 1444.8  | ?                             |                                                    |
| A                                                                                 |                                                                                    | 95             |          | 1331.5  | ?                             |                                                    |
| B                                                                                 |                                                                                    | 100            |          | 1335.4  | ?                             |                                                    |
| B                                                                                 |                                                                                    | 70             |          | 1349.4  | ?                             |                                                    |
| B                                                                                 |                                                                                    | 50             |          | 668.4   | ?                             |                                                    |
| B                                                                                 |                                                                                    | 40             |          | 632.9   | ?                             |                                                    |

TABLE F

P = NG-HYBA, coligand = Tricine + Nicotinic acid

| HPLC peak selected                                                                 | Method A,B,C | % of base peak | m/z calc | m/z obs | assignment                      | Inferred solution species from which in originates |
|------------------------------------------------------------------------------------|--------------|----------------|----------|---------|---------------------------------|----------------------------------------------------|
| 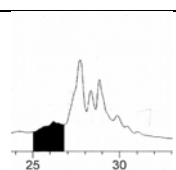  | A            | 100            | 1275.5   | 1275.5  | $[(P-2H)-H]^-$                  | [P-2H]                                             |
|                                                                                    | A            | 60             | 1389.5   | 1388.6  | $[(P+TFA-2H)-H]^-$              |                                                    |
|                                                                                    | A            | 65             |          | 1811.8  | ?                               |                                                    |
|   | A            | 100            |          | 1256.9  | ?                               |                                                    |
|                                                                                    | A            | 70             |          | 1370.3  | ?                               |                                                    |
|                                                                                    | A            | 70             |          | 1437.5  | ?                               |                                                    |
|                                                                                    | A            | 70             |          | 1549.9  | ?                               |                                                    |
|                                                                                    | A            | 50             |          | 1462.7  | ?                               |                                                    |
|   | A            | 100            | 1796.5   | 1795.9  | $[(P+Tc+Tri+2Nic-5H)-5H]^-$     | [P+Tc+Tri+2Nic-5H]                                 |
|                                                                                    | A            | 20             | 1910.5   | 1909.1  | $[(P+Tc+Tri+2Nic+TFA-5H)-5H]^-$ |                                                    |
|                                                                                    | A            | 45             | 1673.5   | 1673.2  | $[(P+Tc+Tri+Nic-5H)-5H]^-$      | [P+Tc+Tri+Nic-5H]                                  |
|                                                                                    | A            | 25             | 1550.5   | 1550.6  | $[(P+Tc+Tri)-5H]^-$             | [P+Tc+Tri-5H]                                      |
|   | A            | 100            |          | 1375.8  | ?                               |                                                    |
|                                                                                    | A            | 80             |          | 1262.6  | ?                               |                                                    |
|                                                                                    | A            | 55             |          | 1418.7  | ?                               |                                                    |
|                                                                                    | A            | 45             |          | 1305.6  | ?                               |                                                    |
|                                                                                    | A            | 100            |          | 1333.4  | ?                               |                                                    |
|                                                                                    | A            | 95             |          | 1456.7  | ?                               |                                                    |
|                                                                                    | A            | 80             |          | 1343.5  | ?                               |                                                    |
|                                                                                    | A            |                |          | 1446.4  | ?                               |                                                    |
|                                                                                    | A            | 100            |          | 1403.6  | ?                               |                                                    |
|                                                                                    | A            |                |          | 1440.7  | ?                               |                                                    |
|  | B            | 100            | 899.8    | 899.7   | $[(P+Tc+Tri+2Nic-5H)+2H]^{2+}$  | [P+Tc+Tri+2Nic-5H]                                 |
|                                                                                    | B            | 3              | 1798.6   | 1799.1  | $[(P+Tc+Tri+2Nic-5H)+H]^+$      |                                                    |
|                                                                                    | C            | 100            | 899.8    | 899.6   | $[(P+Tc+Tri+2Nic-5H)+2H]^{2+}$  |                                                    |
|                                                                                    | B            | 40             | 838.3    | 838.8   | $[(P+Tc+Tri+Nic-5H)+2H]^{2+}$   | [P+Tc+Tri+Nic-5H]                                  |
|                                                                                    | B            | 3              | 1675.5   | 1677.3  | $[(P+Tc+Tri+Nic-5H)+H]^+$       |                                                    |
|                                                                                    | B            |                |          |         |                                 |                                                    |
|                                                                                    | C            | 70             | 838.3    | 838.5   | $[(P+Tc+Tri+Nic-5H)+2H]^{2+}$   |                                                    |

TABLE G  
P = NG-HYBA, coligand = tricine + EDDA

| HPLC peak selected                                                                | Method A,B,C                                                                       | % of base peak | m/z calc | m/z obs | Assignment                  | Inferred solution species from which in originates |
|-----------------------------------------------------------------------------------|------------------------------------------------------------------------------------|----------------|----------|---------|-----------------------------|----------------------------------------------------|
| 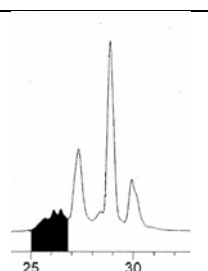 | B                                                                                  | 100            | 775.2    | 775.4   | $[(P+Tc+EDDA-5H)+2H]^{2+}$  | [P+Tc+EDDA-5H]                                     |
|                                                                                   | B                                                                                  | 10             | 1549.5   | 1549.3  | $[(P+Tc+EDDA-5H)+H]^+$      |                                                    |
|                                                                                   | A                                                                                  | 100            | 1661.5   | 1660.7  | $[(P+Tc+EDDA+TFA-5H)-H]^-$  |                                                    |
|                                                                                   | A                                                                                  | 35             | 1547.5   | 1547.4  | $[(P+Tc+EDDA-5H)-H]^-$      |                                                    |
|                                                                                   | C                                                                                  | 100            | 775.2    | 775.2   | $[(P+Tc+EDDA-5H)+2H]^{2+}$  |                                                    |
|                                                                                   | C                                                                                  | 20             | 1549.5   | 1549.4  | $[(P+Tc+EDDA-5H)+H]^+$      |                                                    |
|                                                                                   | A                                                                                  | 20             | 1389.5   | 1388.6  | $[(P-2H+TFA)-H]^-$          | [P-2H]                                             |
|  | B                                                                                  | 100            | 863.3    | 863.5   | $[(P+Tc+2EDDA-5H)+2H]^{2+}$ | [P+Tc+2EDDA-5H]                                    |
|                                                                                   | B                                                                                  | 50             | 1725.6   | 1725.3  | $[(P+Tc+2EDDA-5H)+H]^+$     |                                                    |
|                                                                                   | A                                                                                  | 100            | 1723.6   | 1723.3  | $[(P+Tc+2EDDA-5H)-H]^-$     |                                                    |
|                                                                                   | A                                                                                  | 25             | 1837.6   | 1835.9  | $[(P+Tc+2EDDA+TFA-5H)-H]^-$ |                                                    |
|                                                                                   | C                                                                                  | 100            | 863.3    | 863.3   | $[(P+Tc+2EDDA-5H)+2H]^{2+}$ |                                                    |
|                                                                                   | C                                                                                  | 10             | 1725.6   | 1725.1  | $[(P+Tc+2EDDA-5H)+H]^+$     |                                                    |
|                                                                                   | B                                                                                  | 60             | 1549.5   | 1549.3  | $[(P+Tc+EDDA-5H)+H]^+$      | [P+Tc+EDDA-5H]                                     |
|                                                                                   | B                                                                                  | 20             |          | 676.4   | ?                           |                                                    |
|                                                                                   | B                                                                                  | 20             |          | 1351.4  | ?                           |                                                    |
|                                                                                   | B                                                                                  | 20             |          | 1281.3  | ?                           |                                                    |
|                                                                                   | A                                                                                  | 70             |          | 1462.6  | ?                           |                                                    |
|                                                                                   | A                                                                                  | 55             |          | 1349.4  | ?                           |                                                    |
|                                                                                   |  | B              | 100      |         | 1336.0                      | ?                                                  |
| B                                                                                 |                                                                                    | 20             |          | 668.4   | ?                           |                                                    |
| B                                                                                 |                                                                                    | 5              |          | 1781.0  | ?                           |                                                    |
| A                                                                                 |                                                                                    | 100            |          | 1333.5  | ?                           |                                                    |
| A                                                                                 |                                                                                    | 90             |          | 1446.6  | ?                           |                                                    |
| A                                                                                 |                                                                                    | 3              |          | 1583.5  | ?                           |                                                    |
| B                                                                                 |                                                                                    | 100            |          | 1335.5  | ?                           |                                                    |
| B                                                                                 |                                                                                    | 40             |          | 668.4   | ?                           |                                                    |
| B                                                                                 |                                                                                    | 20             |          | 1249.4  | ?                           |                                                    |
| A                                                                                 |                                                                                    | 100            |          | 1333.5  | ?                           |                                                    |
| A                                                                                 |                                                                                    | 60             |          | 1446.6  | ?                           |                                                    |
| A                                                                                 |                                                                                    | 35             |          | 1416.8  | ?                           |                                                    |
| A                                                                                 |                                                                                    | 25             |          | 1303.6  | ?                           |                                                    |

TABLE H  
P = HYNIC-[gly<sup>8</sup>]nanogastrin, coligand = tricine

| HPLC peak selected                                                                  | Method A,B,C | % of base peak | m/z calc | m/z obs | Assignment                 | Inferred solution species from which in originates |
|-------------------------------------------------------------------------------------|--------------|----------------|----------|---------|----------------------------|----------------------------------------------------|
| 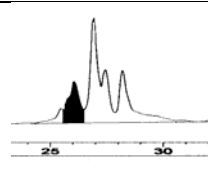 | C            | 100            | 741.1    | 741.5   | $[(P+Tc+Tri-5H)+2H]^{2+}$  | [P+Tc+Tri-5H]                                      |
|                                                                                     | C            | 40             | 1481.2   | 1481.3  | $[(P+Tc+Tri-5H)+H]^+$      |                                                    |
|  | C            | 100            | 741.1    | 741.9   | $[(P+Tc+Tri-5H)+2H]^{2+}$  | [P+Tc+2Tri-5H]                                     |
|                                                                                     | C            | 70             | 1481.2   | 1482.4  | $[(P+Tc+Tri-5H)+H]^+$      |                                                    |
|                                                                                     | C            | 100            | 830.6    | 830.7   | $[(P+Tc+2Tri-5H)+2H]^{2+}$ |                                                    |
|                                                                                     | C            | 15             | 1660.2   | 1660.9  | $[(P+Tc+2Tri-5H)+H]^+$     |                                                    |

Table I. RP-HPLC analysis – Radiometric traces (Method 2) of  $^{99m}\text{Tc}$  and  $^{99}\text{Tc}$  labeled peptides

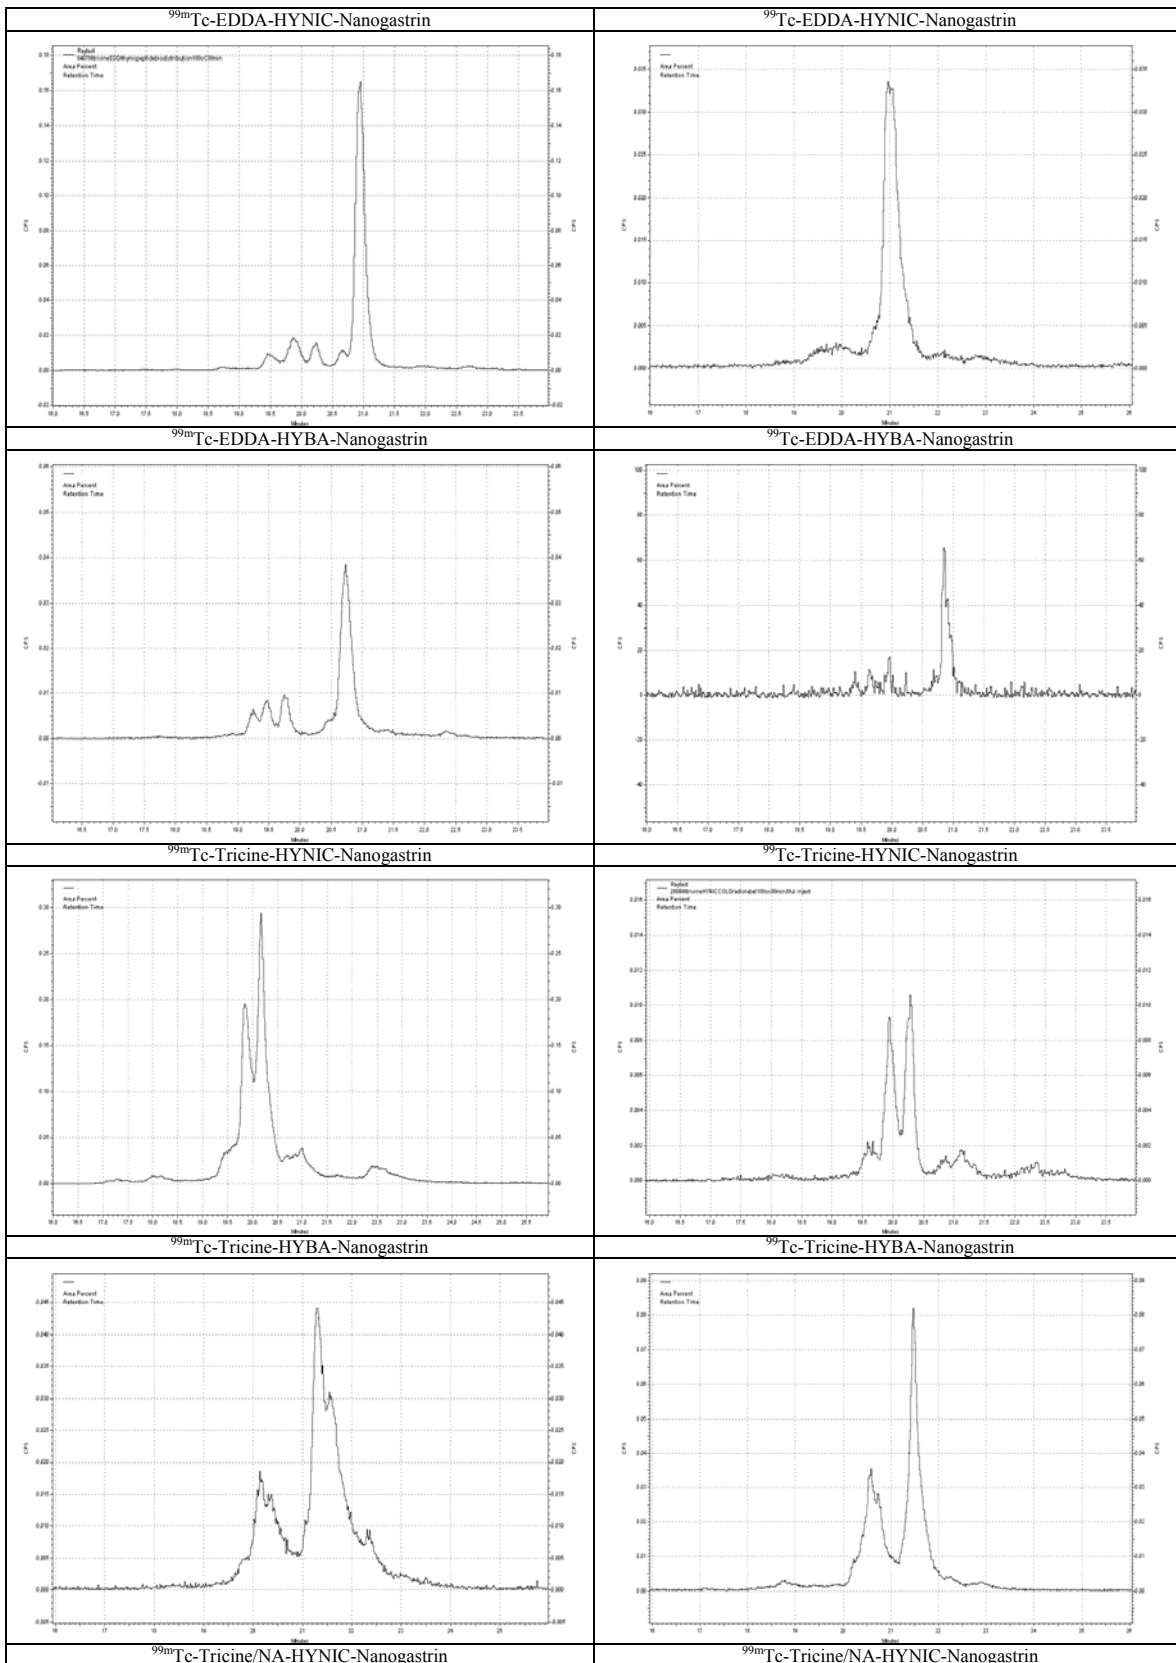

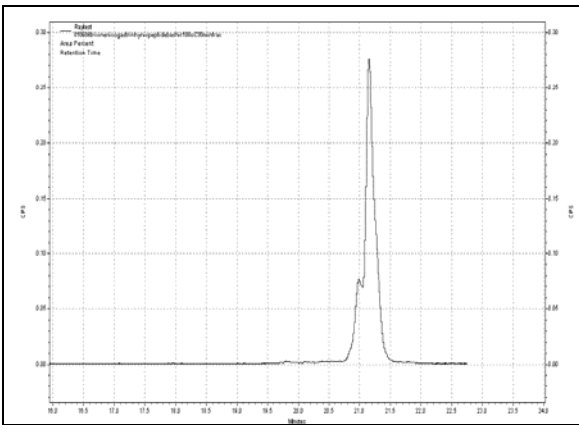

<sup>99m</sup>Tc-Tricine/NA-HYBA-Nanogastrin

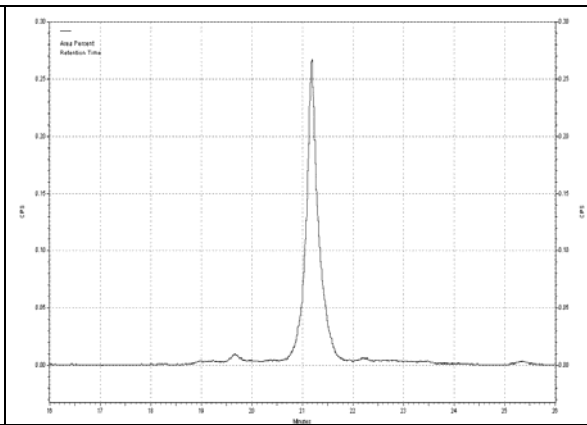

<sup>99m</sup>Tc-Tricine/NA-HYBA-Nanogastrin

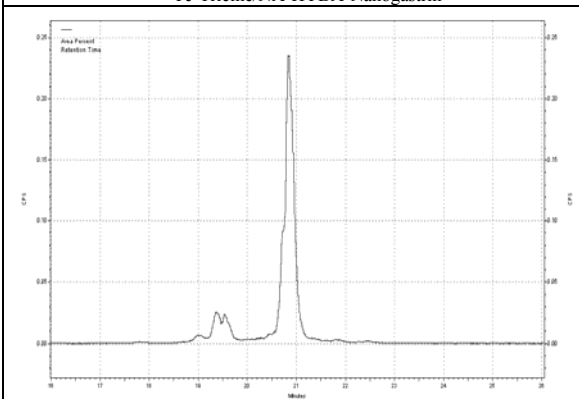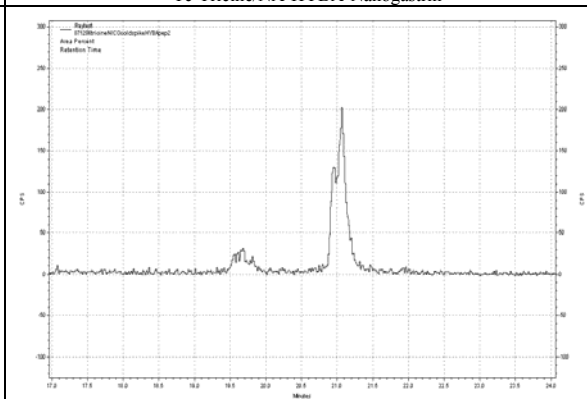

## Figure

High resolution detail of molecular ions to demonstrate confidence in number of protons displaced during Tc-binding

HYNIC-gastrin,  $[M+2H]^{2+}$

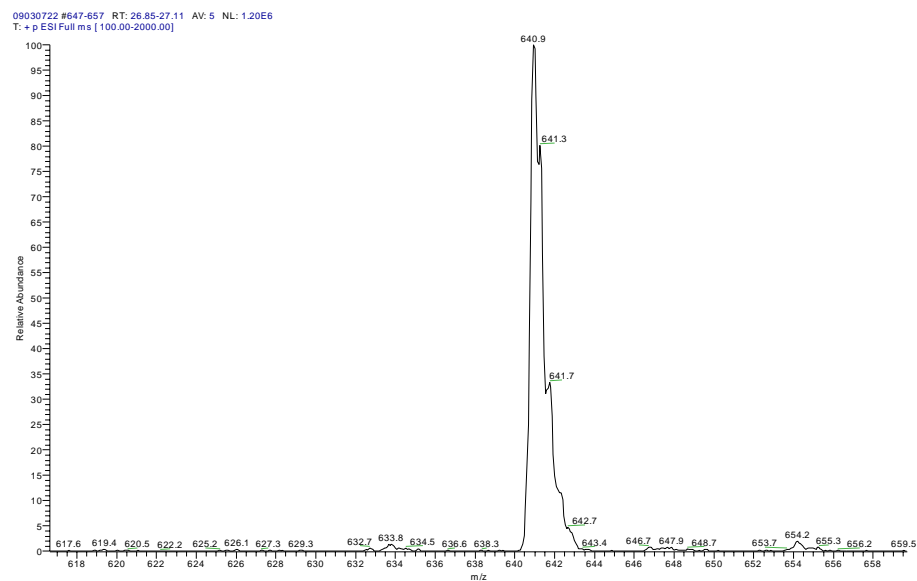

HYNIC-gastrin,  $[M+H]^+$

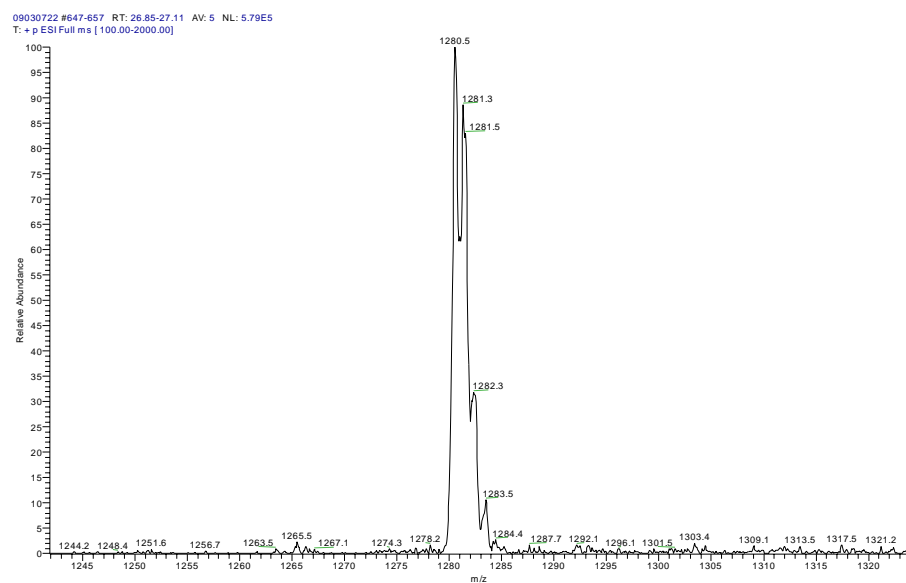

# HYBA-gastrin, [M+2H]<sup>2+</sup>

09030723 #661-667 RT: 25.82-26.04 AV: 4 NL: 6.07E4  
T: + p ESI Full ms [100.00-2000.00]

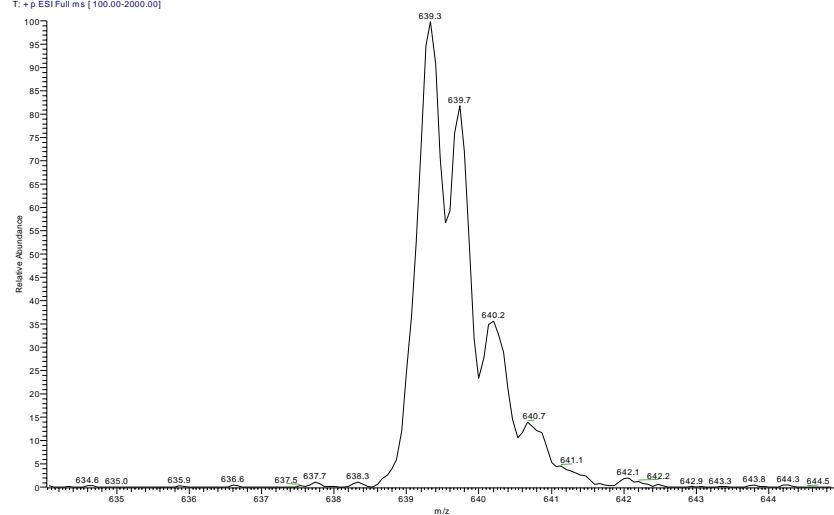

# HYBA-gastrin, [M+H]<sup>+</sup>

09030723 #661-667 RT: 25.82-26.04 AV: 4 NL: 2.34E4  
T: + p ESI Full ms [100.00-2000.00]

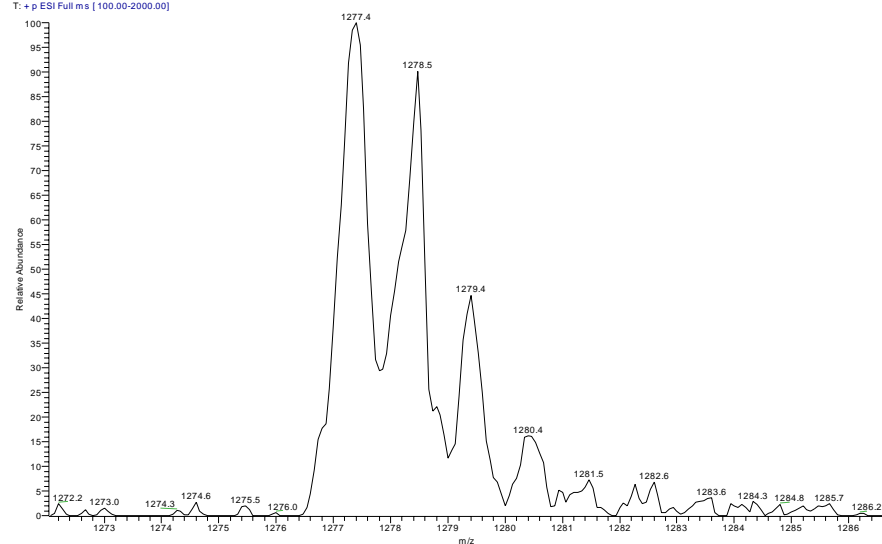

# HYNIC-[Gly<sup>8</sup>-gastrin], [M+2H]<sup>2+</sup>

26030701 #485 RT: 22.90 AV: 1 NL: 2.03E6  
T: + p ESI Full ms [100.00-2000.00]

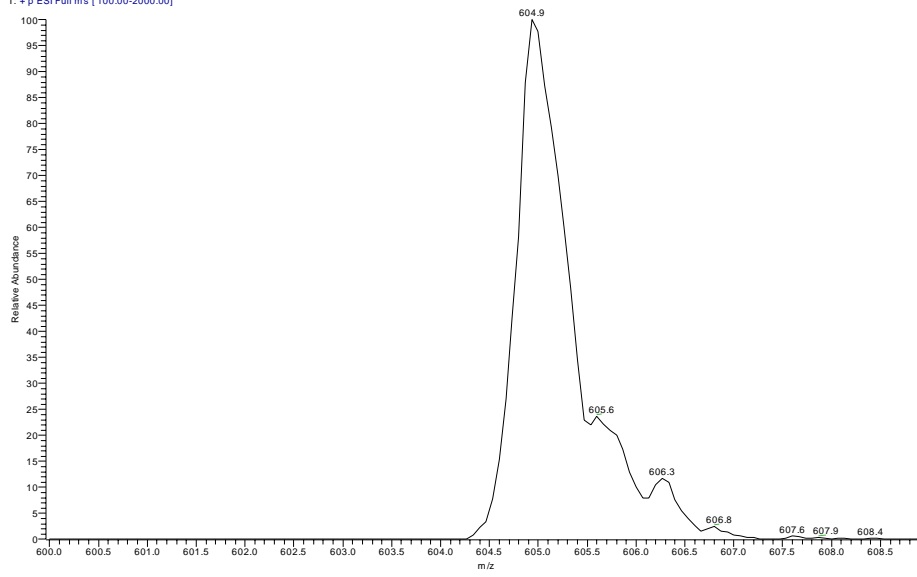

# HYNIC-[Gly<sup>8</sup>-gastrin], [M+H]<sup>+</sup>

26030701 #485 RT: 22.90 AV: 1 NL: 1.24E6  
T: + p ESI Full ms [100.00-2000.00]

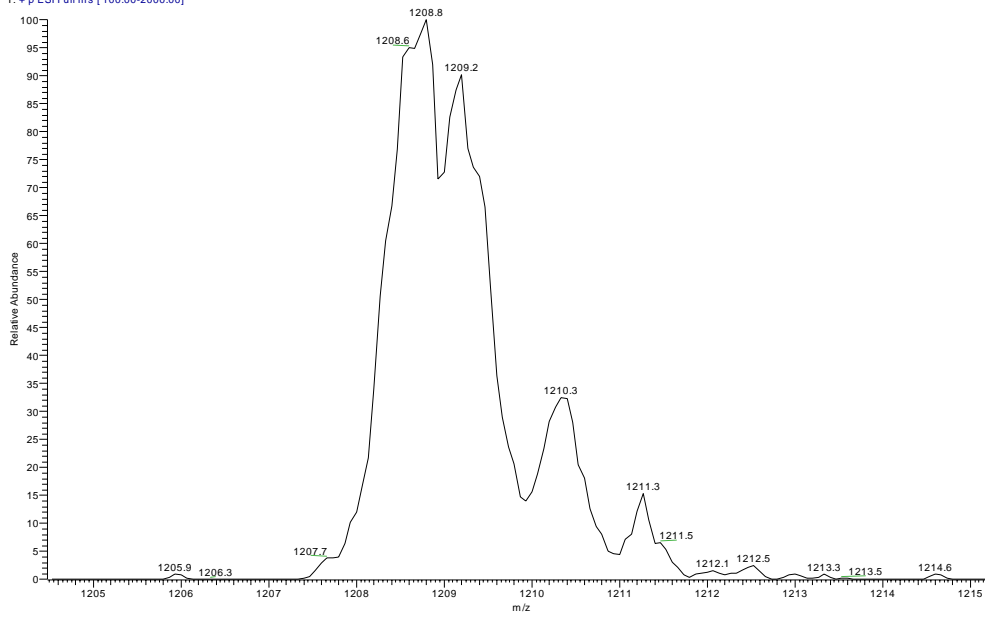

### HYNIC-nanogastrin

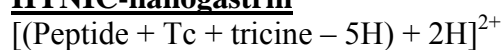

$m/z = 777.4$

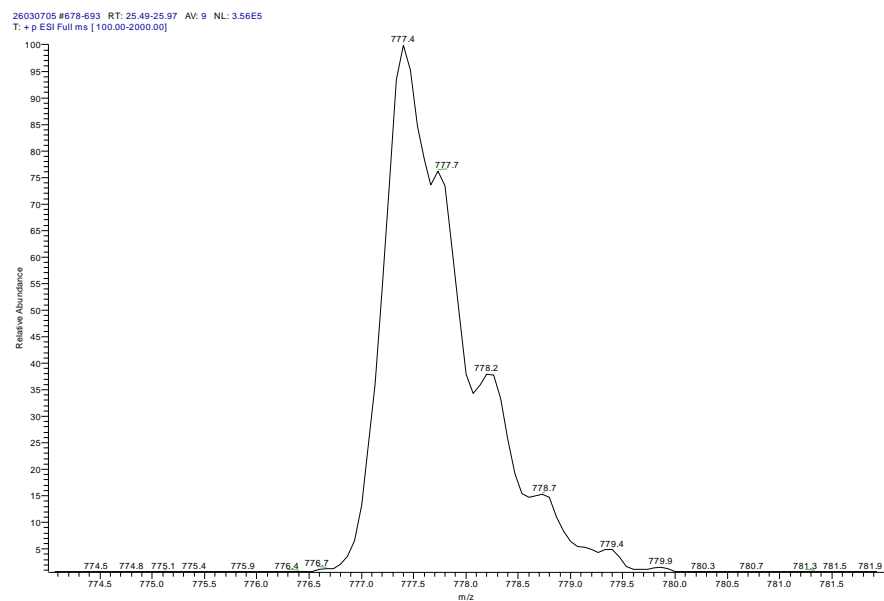

### HYNIC-nanogastrin

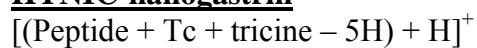

$m/z = 1553.3$

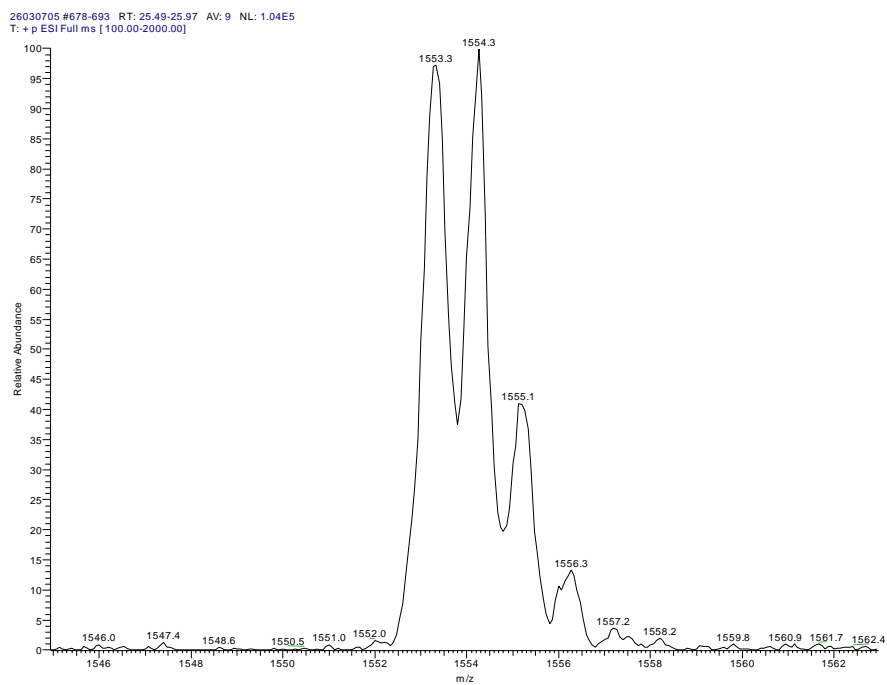

### **HYNIC-nanogastrin**

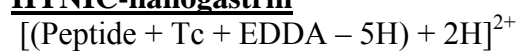

$m/z = 775.7$

09030720 #538-542 RT: 25.88-26.08 AV: 5 NL: 4.40E3  
T: + p ESI Full ms [100.00-2000.00]

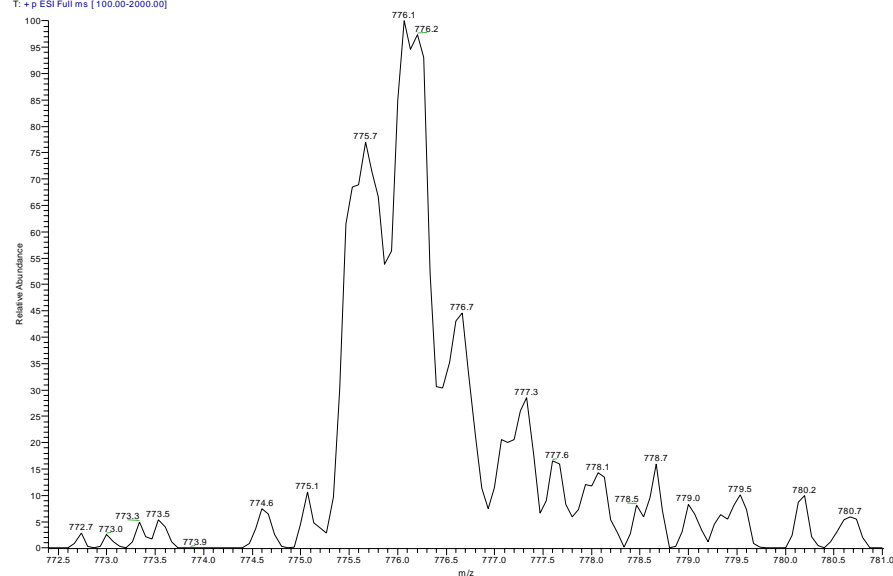

### **HYNIC-nanogastrin**

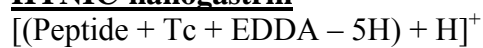

$m/z = 1550.2$

09030720 #538-542 RT: 25.88-26.08 AV: 5 NL: 1.50E3  
T: + p ESI Full ms [100.00-2000.00]

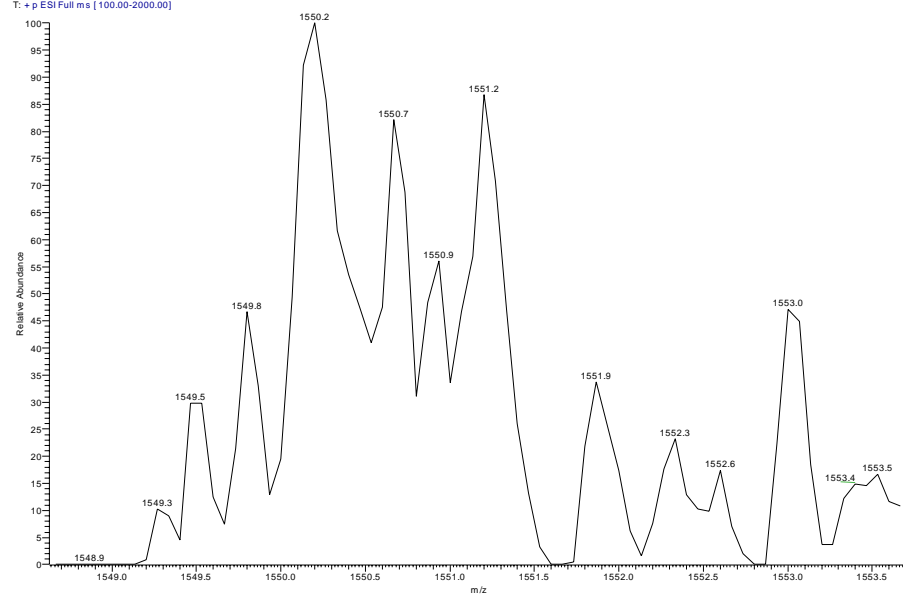

### HYNIC-nanogastrin

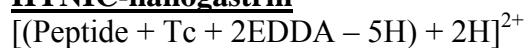

$m/z = 863.9$

09030720 #560-566 RT: 26.98-27.25 AV: 6 NL: 9.21E4  
T: + p ESI Full ms [100.00-2000.00]

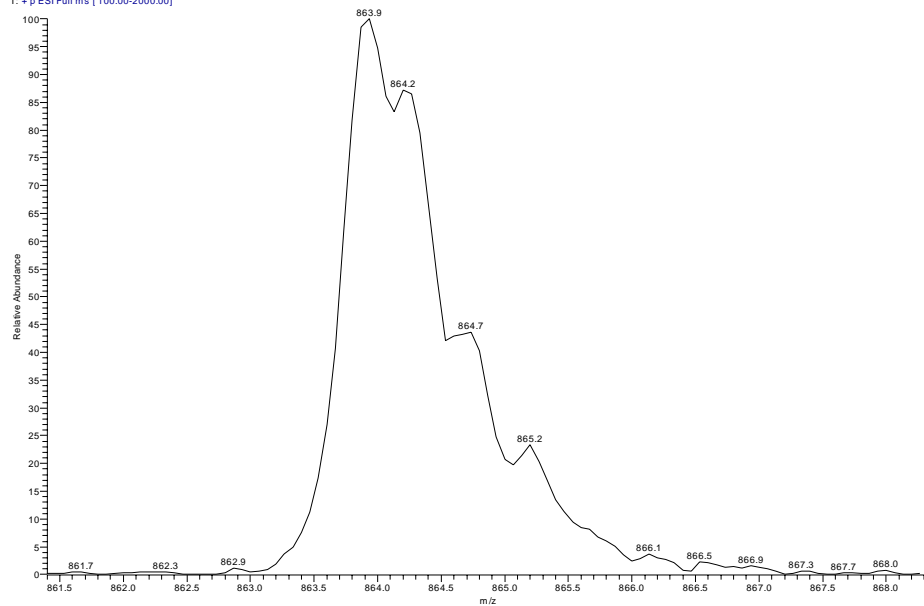

### HYNIC-nanogastrin

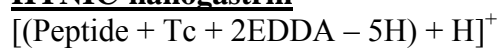

$m/z = 1726.1$

09030720 #566-571 RT: 27.25-27.45 AV: 4 NL: 1.04E4  
T: + p ESI Full ms [100.00-2000.00]

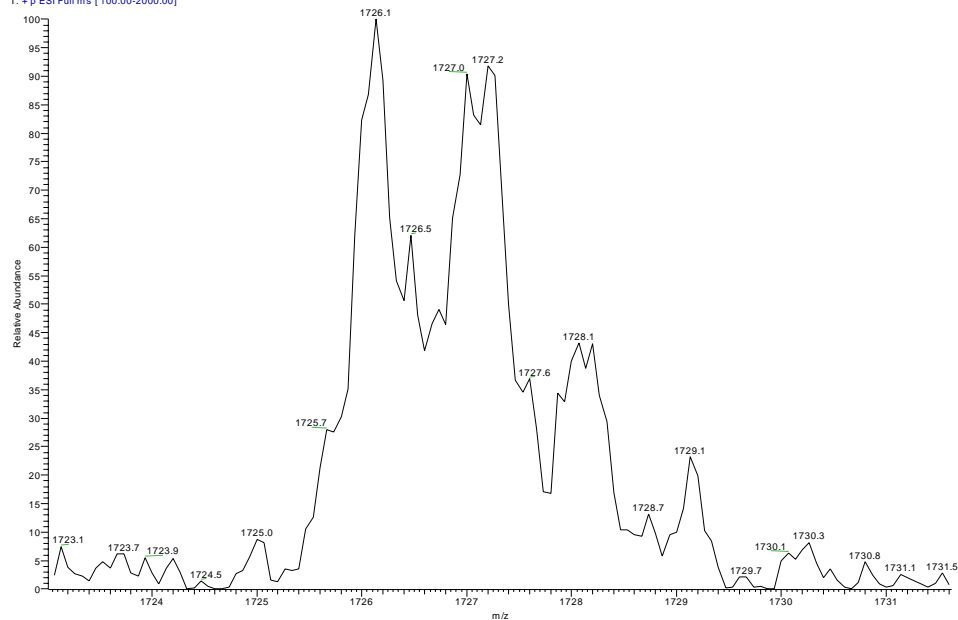

### HYNIC-nanogastrin

$[(\text{Peptide} + \text{Tc} + \text{tricine} + \text{nic} - 5\text{H}) + 2\text{H}]^{2+}$

$m/z = 838.9$

09030718 #578-584 RT: 27.47-27.67 AV: 4 NL: 1.54E5  
T: + p ESI Full ms [100.00-2000.00]

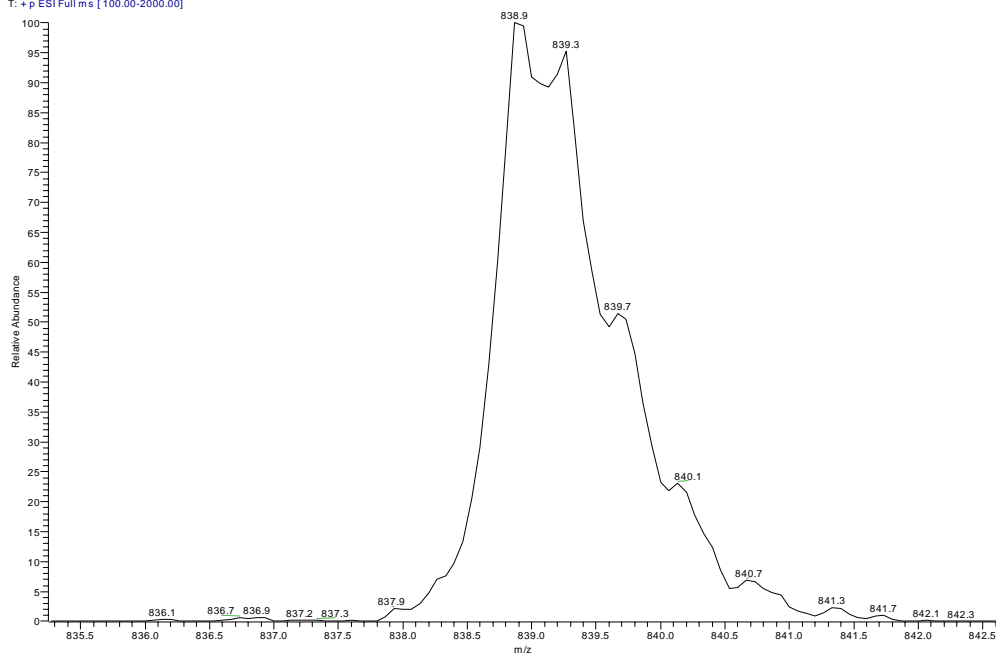

### HYNIC-nanogastrin

$[(\text{Peptide} + \text{Tc} + \text{tricine} + \text{nic} - 5\text{H}) + 2\text{H}]^{2+}$

$m/z = 1676.4$

09030718 #578-584 RT: 27.47-27.67 AV: 4 NL: 2.30E4  
T: + p ESI Full ms [100.00-2000.00]

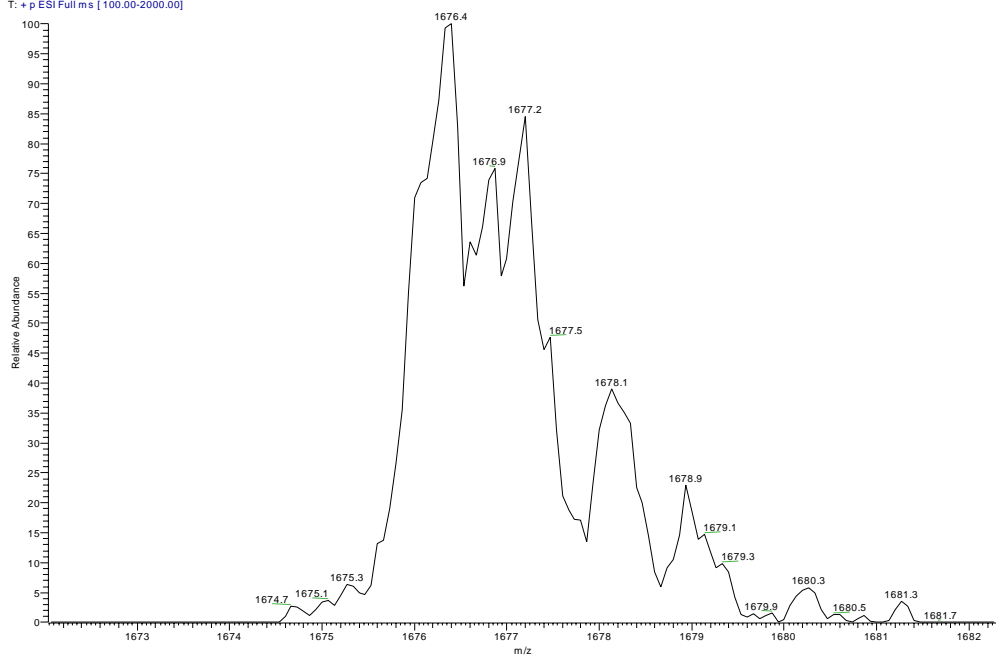

### **HYNIC-nanogastrin**

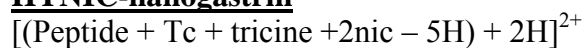

$m/z = 900.2$

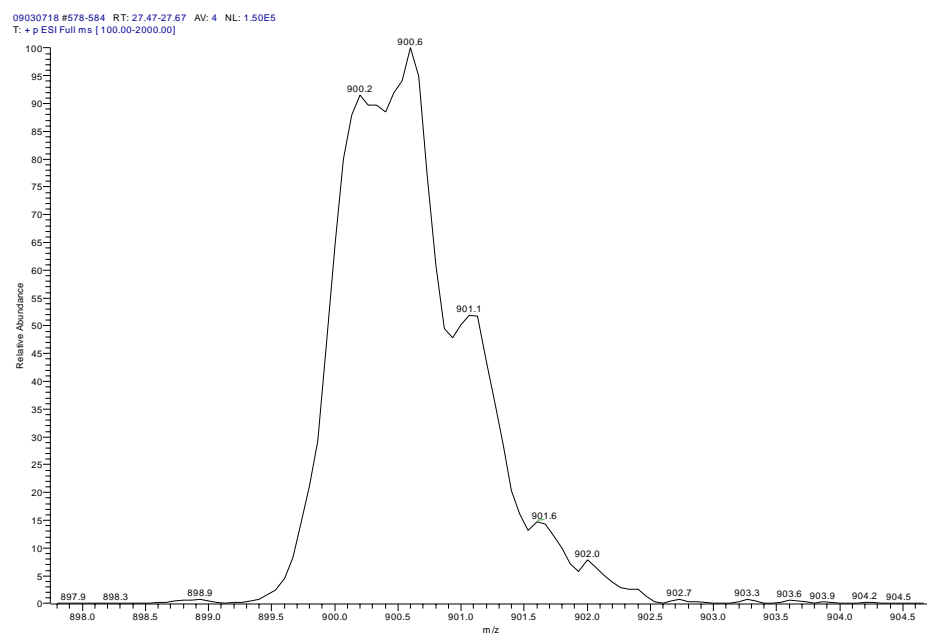

### **HYNIC-nanogastrin**

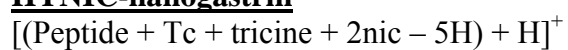

$m/z = 1798.8$

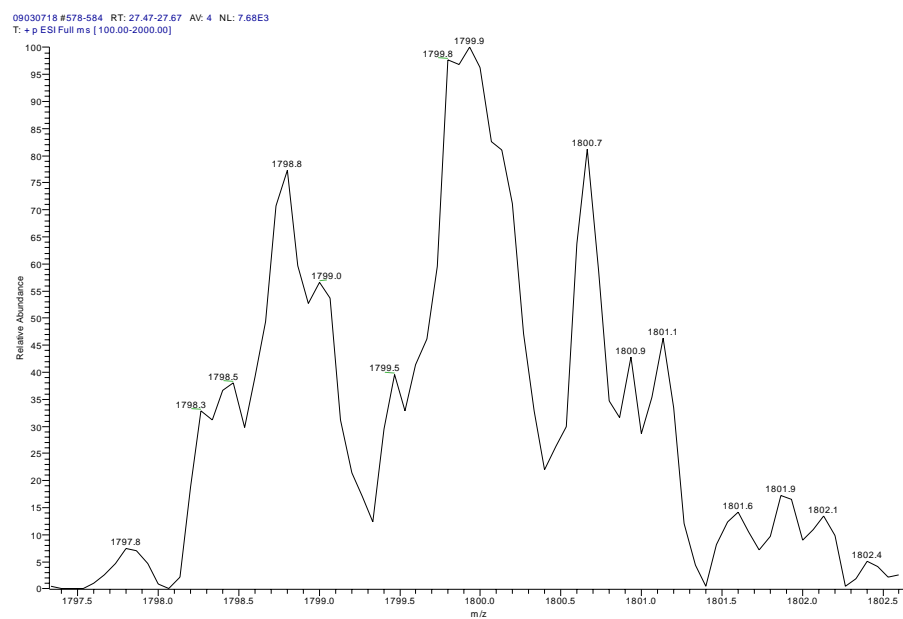

### HYBA-nanogastrin

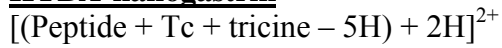

m/z = 776.8

26030706 #653-660 RT: 26.81-27.16 AV: 8 NL: 1.55E4  
T: +p ESI Full ms [100.00-2000.00]

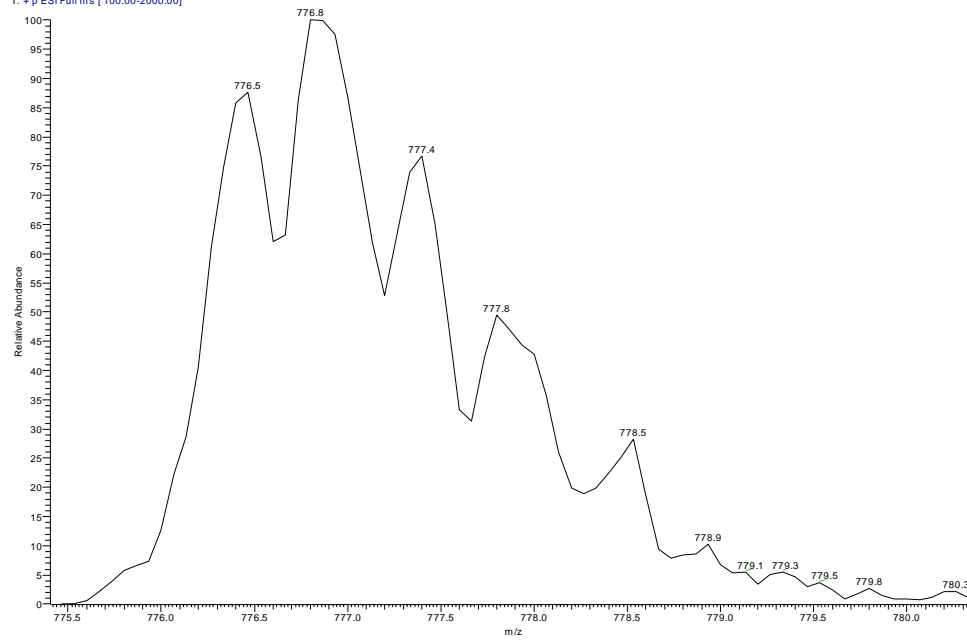

### HYBA-nanogastrin

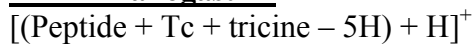

m/z = 1552.2

26030706 #653-660 RT: 26.81-27.16 AV: 8 NL: 5.76E3  
T: +p ESI Full ms [100.00-2000.00]

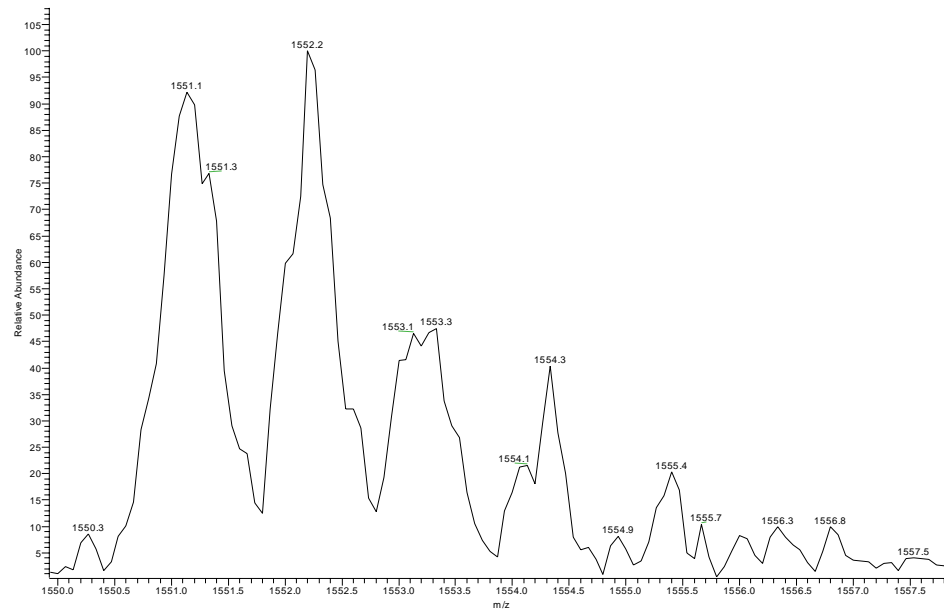

### HYBA-nanogastrin

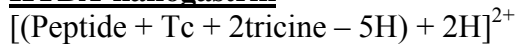

m/z = 865.9

26030706 #636-645 RT: 26.01-26.42 AV: 9 NL: 7.78E4  
T: +P ESI Full ms [100.00-2000.00]

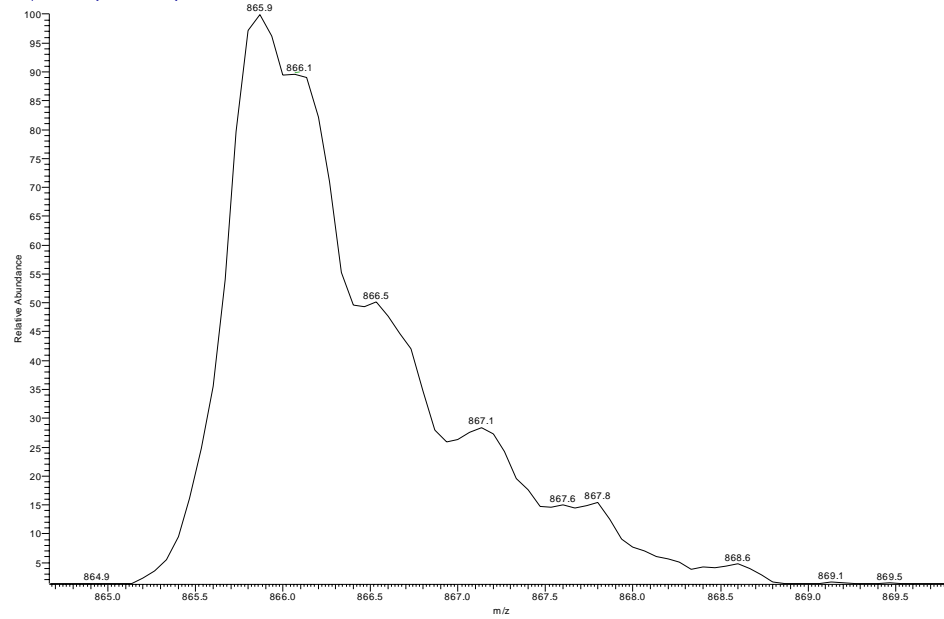

### HYBA-nanogastrin

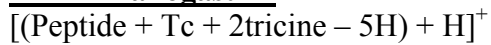

m/z = 1729.9

26030706 #636-645 RT: 26.01-26.42 AV: 9 NL: 1.01E4  
T: +P ESI Full ms [100.00-2000.00]

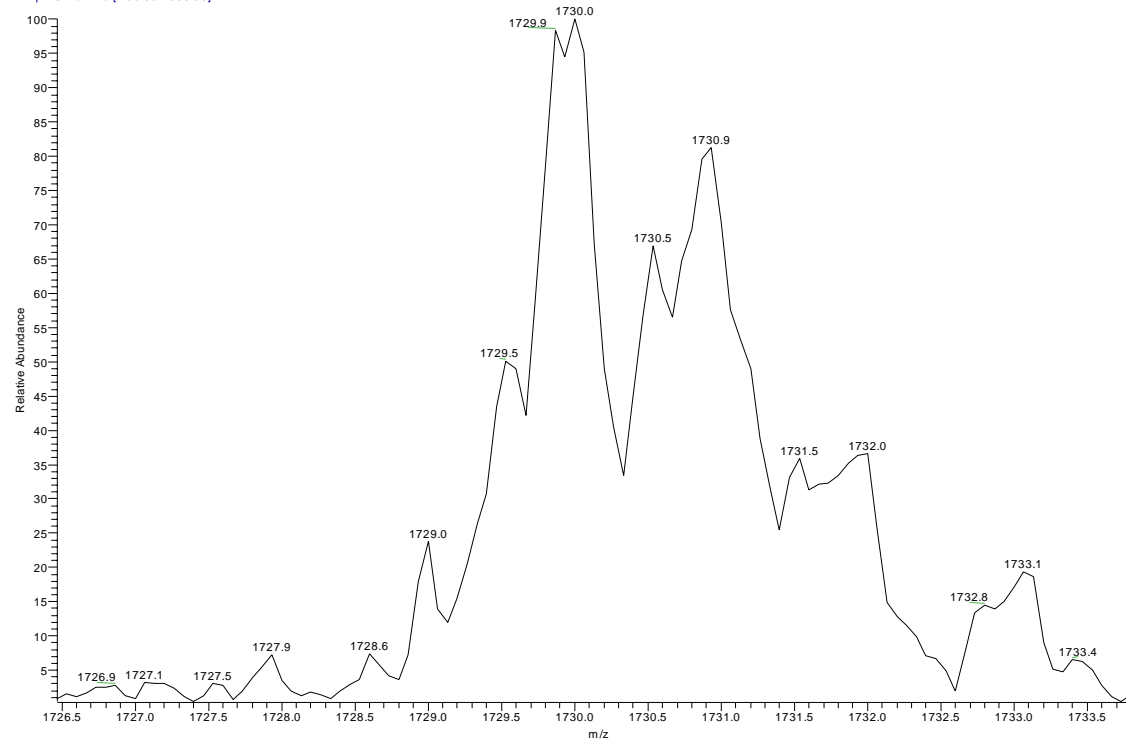

### **HYBA-nanogastrin**

$[(\text{Peptide} + \text{Tc} + \text{EDDA} - 5\text{H}) + 2\text{H}]^{2+}$

$m/z = 775.3$

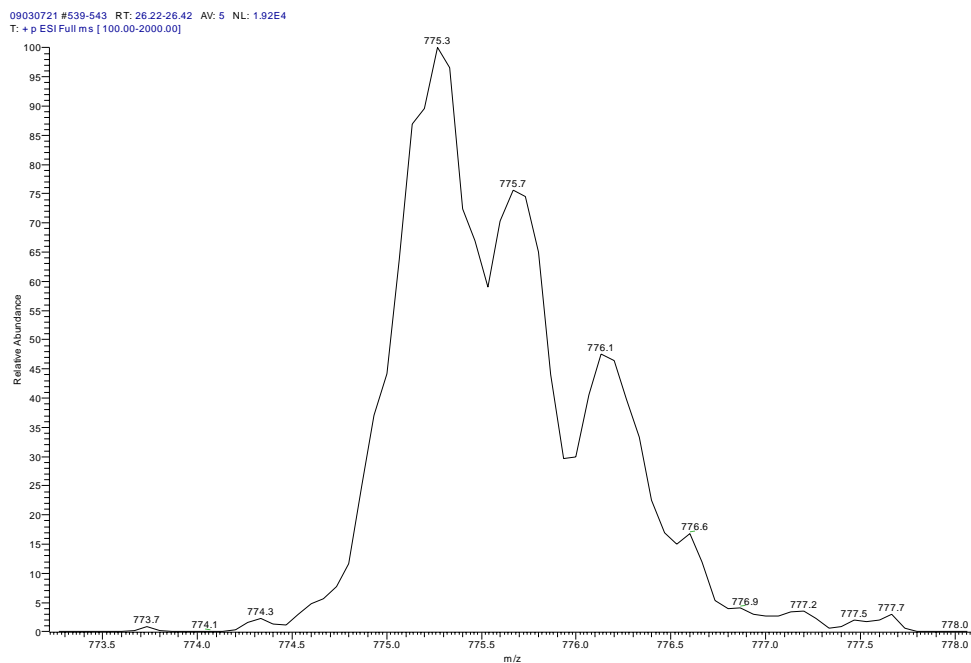

### **HYBA-nanogastrin**

$[(\text{Peptide} + \text{Tc} + \text{EDDA} - 5\text{H}) + \text{H}]^+$

$m/z = 1549.1$

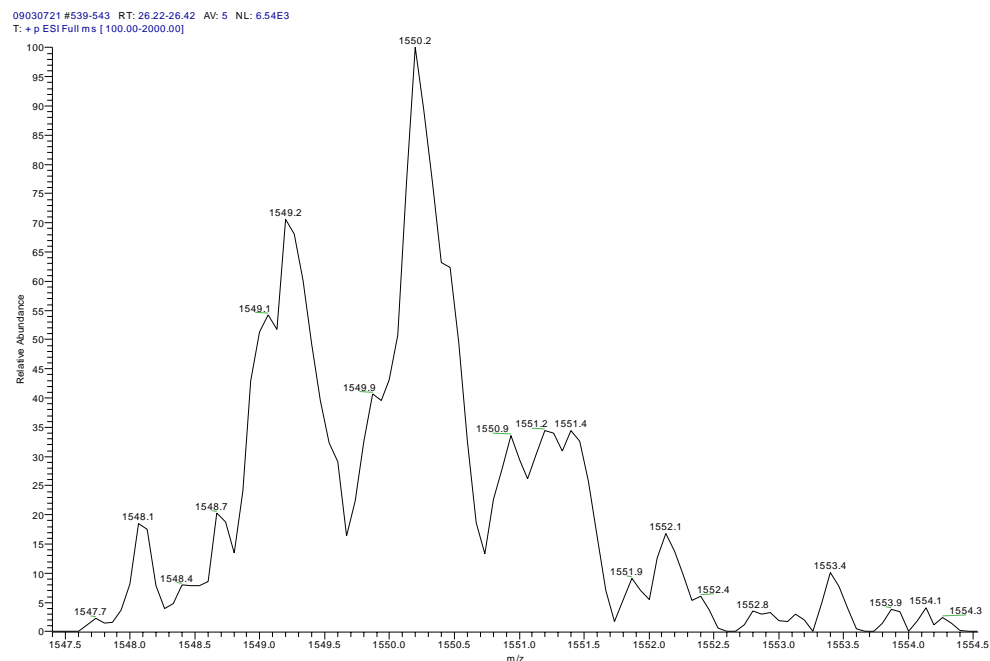

### HYBA-nanogastrin

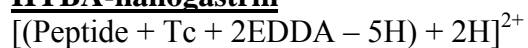

$m/z = 863.3$

09030721 #555-565 RT: 27.02-27.51 AV: 11 NL: 3.17E4  
T: + p ESI Full ms [100.00-2000.00]

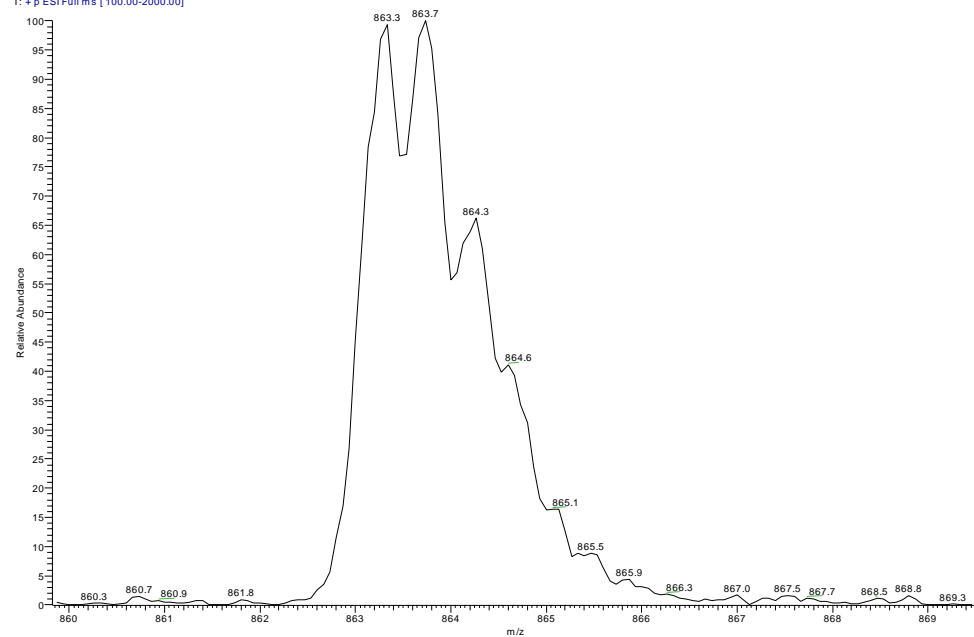

### HYBA-nanogastrin

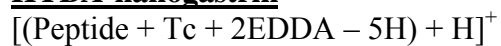

$m/z = 1725.1$

09030721 #555-565 RT: 27.02-27.51 AV: 11 NL: 3.28E3  
T: + p ESI Full ms [100.00-2000.00]

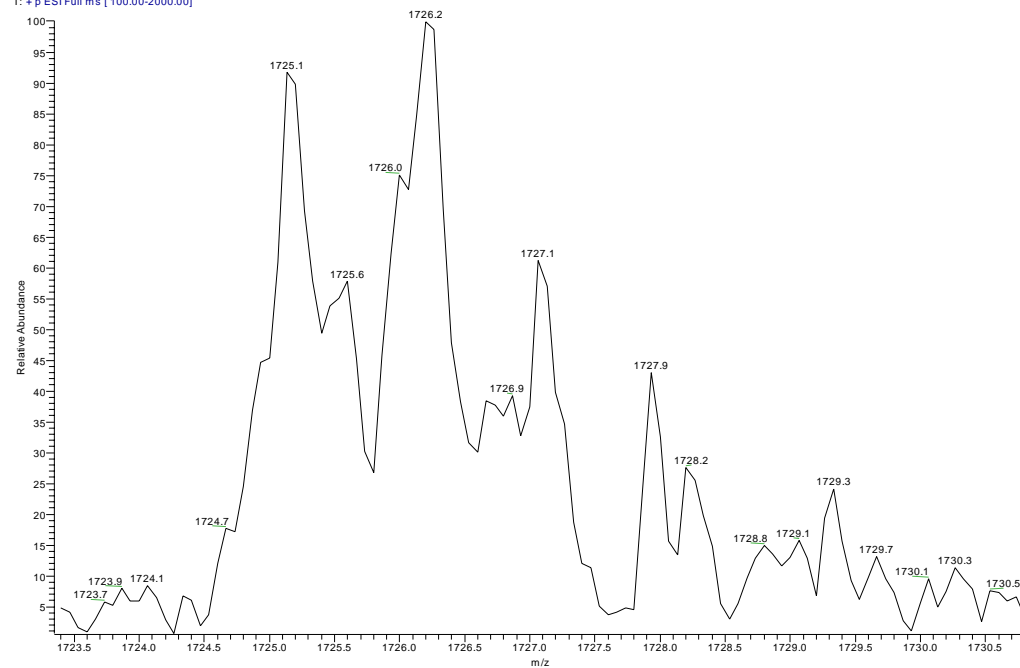

### HYBA-nanogastrin

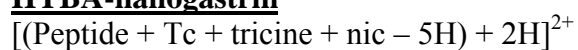

$m/z = 838.5$

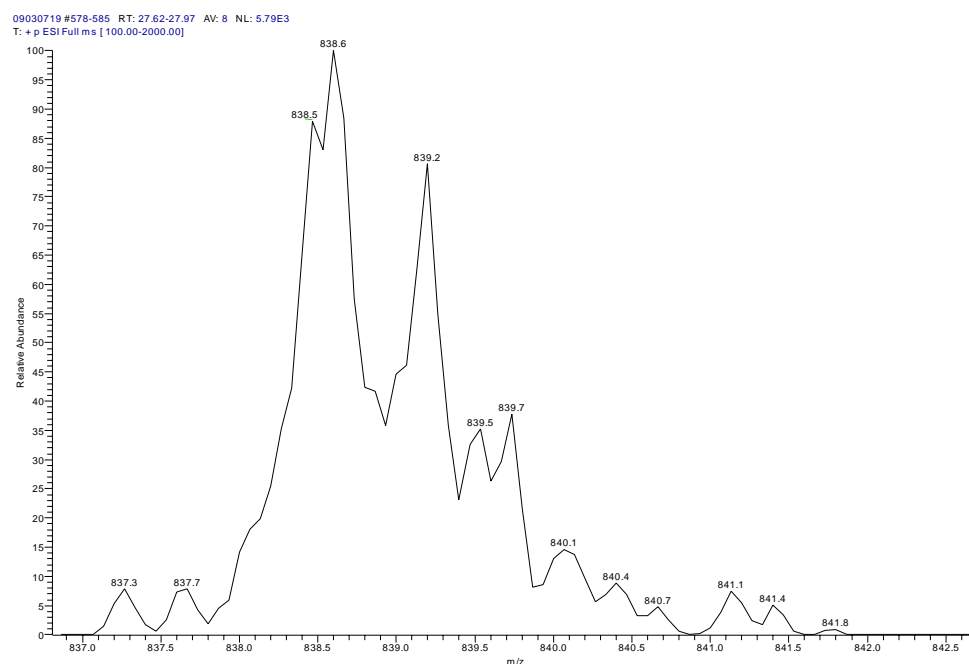

(did not detect  $[(\text{Peptide} + \text{Tc} + \text{tricine} + \text{nic} - 5\text{H}) + \text{H}]^+$  due to weak sample)

### HYBA-nanogastrin

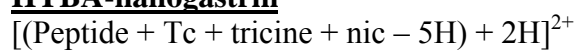

$m/z = 899.5$

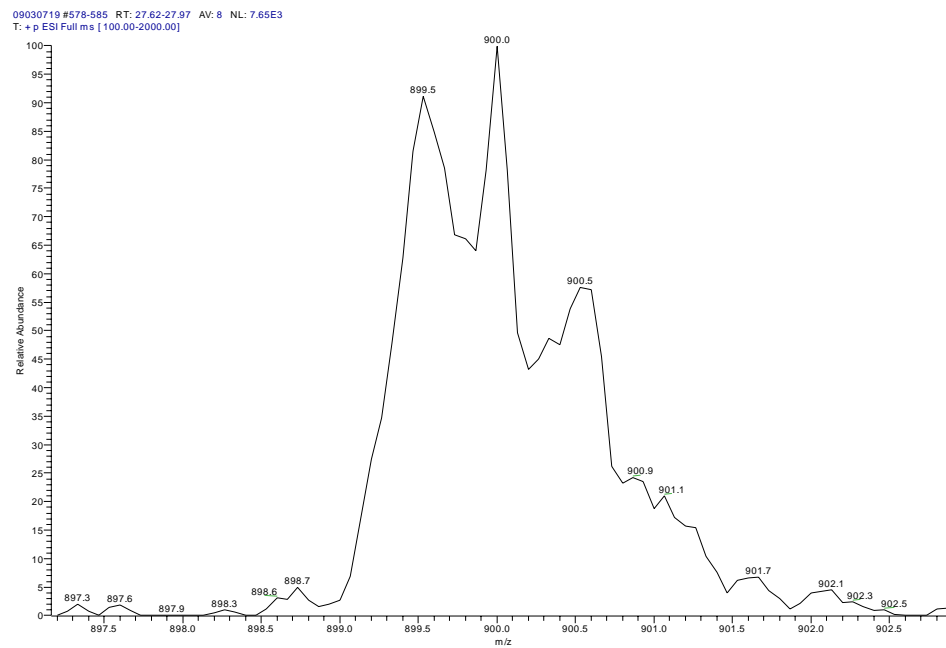

**HYNIC-[Gly<sup>8</sup>]-nanogastrin**  
**[(Peptide + Tc + tricine - 5H) + 2H]<sup>2+</sup>**  
**m/z = 741.5**

26030703 #535-545 RT: 25.62-26.04 AV: 9 NL: 1.38E5  
T: + p ESI Full ms [100.00-2000.00]

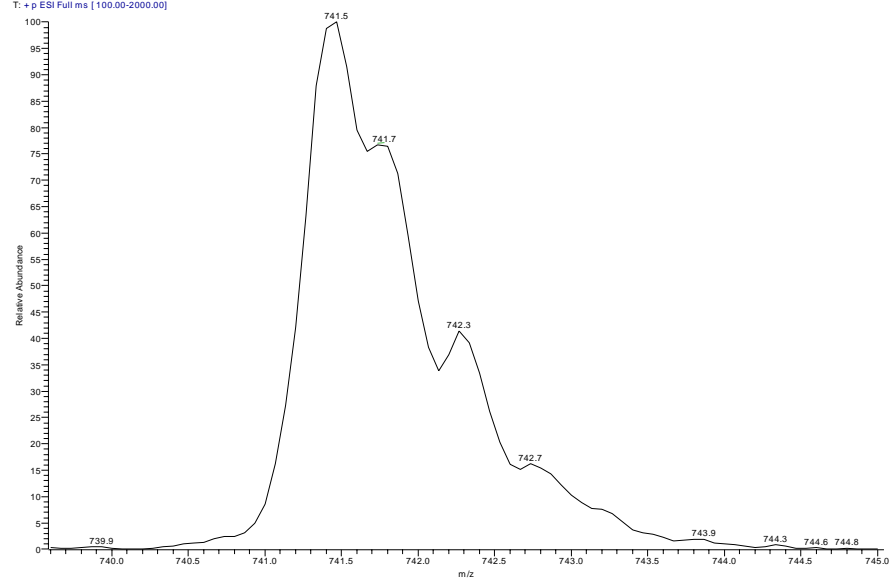

**HYNIC-[Gly<sup>8</sup>]-nanogastrin**  
**[(Peptide + Tc + tricine - 5H) + H]<sup>+</sup>**  
**m/z = 1481.3**

26030703 #535-545 RT: 25.62-26.04 AV: 9 NL: 4.85E4  
T: + p ESI Full ms [100.00-2000.00]

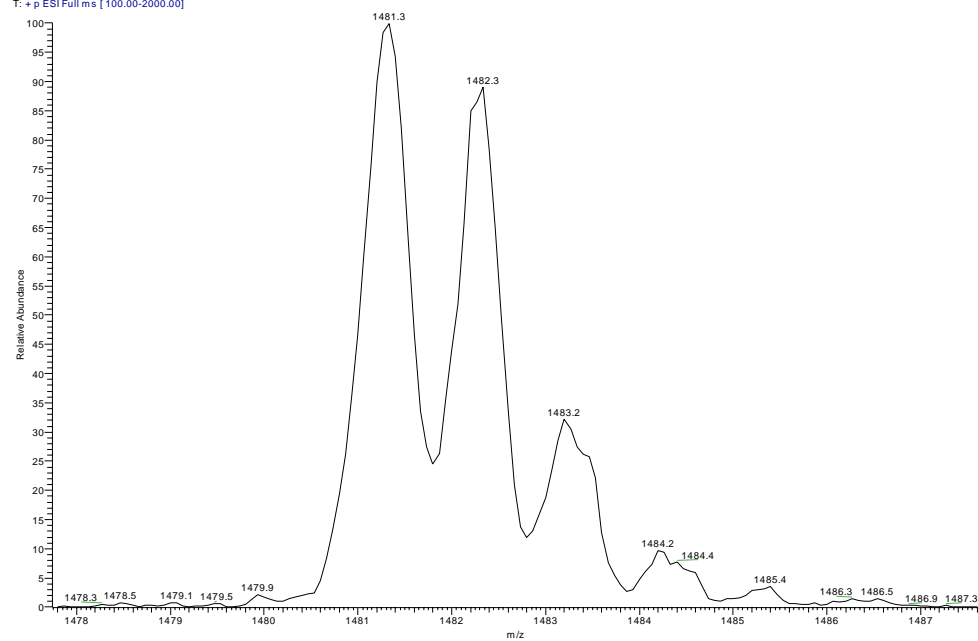

**HYNIC-[Gly<sup>8</sup>]-nanogastrin**  
[(Peptide + Tc + 2tricine - 5H) + 2H]<sup>2+</sup>  
m/z = 830.7

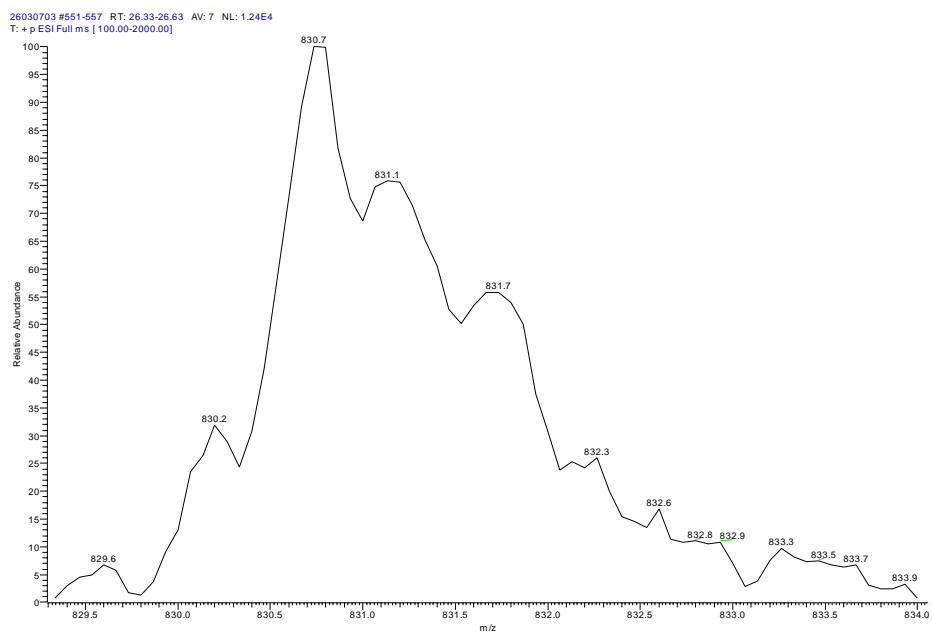

**HYNIC-[Gly<sup>8</sup>]-nanogastrin**  
[(Peptide + Tc + 2tricine - 5H) + H]<sup>+</sup>  
m/z = 1660.1

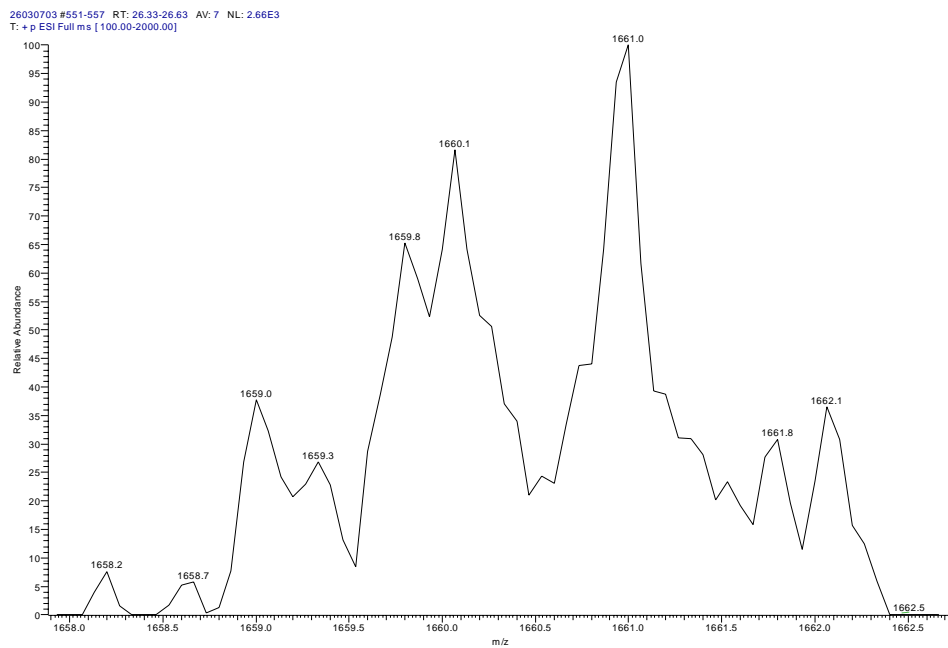

Supplement: b705111e.pdf [file b705111e.pdf]
